# Supplementary material for: In situ Patch-seq analysis of microglia reveals a lack of stress genes as found in FACS-isolated microglia
Source: PubMed Central journal article supplement (PMC11239014; doi:10.1371/journal.pone.0302376), 2024-07-11

**A**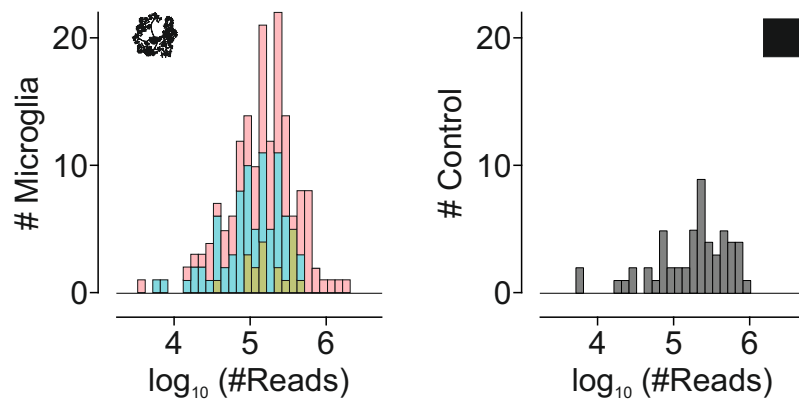**B**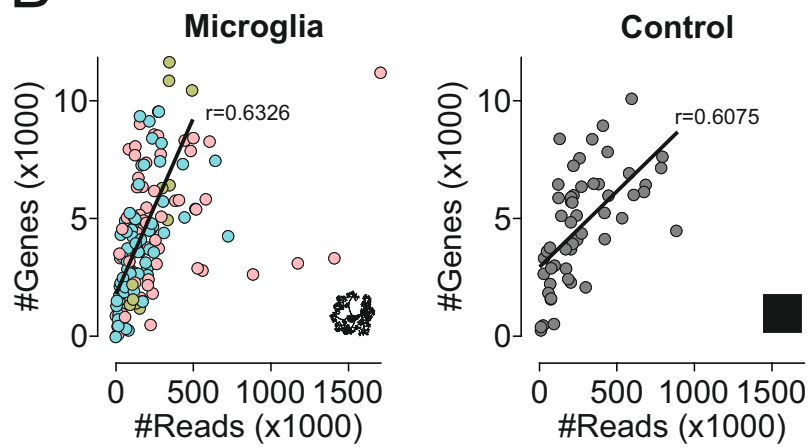**C**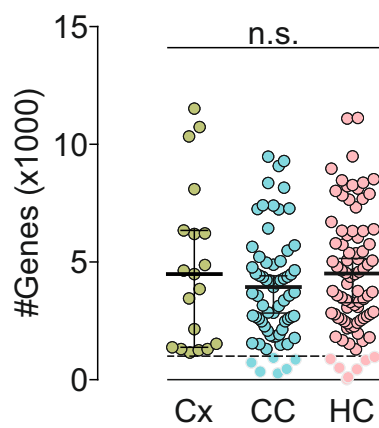

Supplement: pone.0302376.s002.pdf [file pone.0302376.s002.pdf]
